# Supplementary material for: The Effects of Lifetime Estrogen Exposure on Breast Epigenetic Age
Source: Oxford University Press journal article supplement (doi:10.1158/1055-9965.epi-20-1297), 2021-03-26
Supplement: 10559965epi201297-sup-250709_3_supp_6896054_qnz5wh.docx [file 10559965epi201297-sup-250709_3_supp_6896054_qnz5wh.docx]

**Supplementary Table 2. Bivariate analyses of hormonal factors associated with epigenetic age acceleration*.**

|  | **Grim age acceleration** | | **Pan-tissue age acceleration** | | **Hannum age acceleration** | | **Phenotypic age acceleration** | | **Skin and Blood age acceleration** | |
| --- | --- | --- | --- | --- | --- | --- | --- | --- | --- | --- |
|  | β | p | β | p | β | p | β | p | β | p |
| **Ethnicity**  **Hispanic** | 1.60 | 0.10 | 1.19 | 0.36 | **4.27** | **0.0053** | 6.41 | 0.096 | **7.51** | **0.010** |
| **Tobacco use**  **Ever**  **Years smoked**  **Cigarettes Per Day**  **1-10**  **11-20**  **21-40**  **41-60** | 0.079  0.030  0.27  0.58  1.3  2.3 | 0.10  0.16  0.68  0.34  0.19  0.26 | 0.64  -0.0063  **-0.55**  **0.25**  **0.16**  **7.5** | 0.31  0.82  **0.52**  **0.75**  **0.90**  **0.0059** | 0.69  0.026  2.1  0.44  -0.94  4.2 | 0.36  0.43  0.046  0.65  0.54  0.19 | 3.3  0.026  2.4  2.0  1.1  9.0 | 0.071  0.75  0.35  0.40  0.79  0.26 | 1.0  -0.023  0.79  0.37  -0.66  5.2 | 0.46  0.72  0.69  0.84  0.83  0.40 |
| **Body mass index**  **Overweight**  **Obese** | **0.091**  **1.33**  **1.72** | **2.6x10-3**  **8.5x10-3**  **4.1x10-4** | 0.035  0.87  0.97 | 0.38  0.20  0.14 | **0.16**  **1.57**  **2.30** | **6.2x10-5**  **0.049**  **2.8x10-3** | **0.26**  **4.30**  **5.16** | **0.029**  **0.032**  **0.0071** | **0.21**  **3.01**  **3.88** | **0.018**  **0.049**  **8.1x10-3** |
| **Age at menarche** | **-0.29** | **0.027** | -0.25 | 0.14 | -0.048 | 0.82 | -0.53 | 0.31 | **-0.84** | **0.032** |
| **Premenopausal** | -0.078 | 0.85 | -0.36 | 0.52 | -0.085 | 0.90 | 0.88 | 0.59 | 0.20 | 0.74 |
| **Age at menopause** | -0.048 | 0.28 | 0.024 | 0.68 | -0.022 | 0.71 | -0.13 | 0.41 | -0.042 | 0.73 |
| **Total menstrual years** | -0.012 | 0.62 | 0.039 | 0.24 | -0.014 | 0.72 | -0.044 | 0.66 | 0.0027 | 0.97 |
| **Gravidity** | 0.076 | 0.54 | -0.15 | 0.36 | 0.13 | 0.49 | 0.64 | 0.19 | 0.22 | 0.54 |
| **Parity** | 0.11 | 0.49 | -0.26 | 0.21 | 0.19 | 0.43 | 0.74 | 0.23 | 0.32 | 0.49 |
| **Age at first live birth** | -0.042 | 0.45 | 0.11 | 0.15 | -0.11 | 0.19 | -0.16 | 0.52 | -0.12 | 0.45 |
| **Breastfeeding**  **Ever**  **Total months** | 0.18  0.011 | 0.68  0.49 | -0.56  -0.0040 | 0.33  0.85 | -0.036  0.024 | 0.96  0.33 | 0.88  0.082 | 0.60  0.19 | 0.17  0.038 | 0.90  0.43 |
| **Birth control** | -0.0055 | 0.92 | -0.55 | 0.47 | -0.43 | 0.63 | 0.64 | 0.78 | -0.00066 | 0.99 |
| **Hormone replacement** | 0.11 | 0.83 | 0.088 | 0.89 | -0.34 | 0.65 | -0.26 | 0.90 | -1.0 | 0.48 |

|  |  |  |  |  |  |  |  |  |  |
| --- | --- | --- | --- | --- | --- | --- | --- | --- | --- |
|  |  |  |  |  |  |  |  |  |  |

*Each epigenetic age acceleration measure is adjusted for chronologic age.
