# Supplementary material for: The Effects of Lifetime Estrogen Exposure on Breast Epigenetic Age
Source: Oxford University Press journal article supplement (doi:10.1158/1055-9965.epi-20-1297), 2021-03-26
Supplement: 10559965epi201297-sup-250709_3_supp_6896055_qnz5wh.docx [file 10559965epi201297-sup-250709_3_supp_6896055_qnz5wh.docx]

**Supplementary Table 3. Bivariate analyses of hormonal factors associated with epigenetic age acceleration*, stratified by menopausal status.**

|  | **Grim age acceleration** | | **Pan-tissue age acceleration** | | **Hannum age acceleration** | | **Phenotypic age acceleration** | | **Skin and Blood age acceleration** | |
| --- | --- | --- | --- | --- | --- | --- | --- | --- | --- | --- |
| ***Pre-menopausal*** | β | p | β | p | β | p | β | p | β | p |
| **Ethnicity**  **Hispanic** | **3.54** | **0.024** | 2.74 | 0.20 | **9.11** | **7.6x10-4** | **16.7** | **0.013** | **18.5** | **2.6x10-4** |
| **Tobacco use**  **Ever**  **Years smoked** | -0.36  1.6x10-4 | 0.64  0.997 | -0.65  -0.11 | 0.51  0.066 | 0.36  0.031 | 0.79  0.69 | 0.50  0.10 | 0.88  0.60 | -0.10  -0.0091 | 0.97  0.95 |
| **Body mass index**  **Overweight**  **Obese** | 0.070  **1.25**  0.70 | 0.090  **0.038**  0.29 | -0.014  1.21  -0.61 | 0.81  0.14  0.49 | **0.19**  1.56  1.96 | **0.0080**  0.14  0.088 | 0.23  **5.29**  1.87 | 0.21  **0.042**  0.51 | 0.23  3.24  2.46 | 0.086  0.11  0.26 |
| **Age at menarche** | **-0.43** | **0.011** | -0.20 | 0.39 | -0.46 | 0.13 | -0.88 | 0.23 | **-1.19** | **0.032** |
| **Total menstrual years** | 0.014 | 0.67 | 0.048 | 0.27 | 0.019 | 0.75 | 0.081 | 0.57 | 0.055 | 0.61 |
| **Gravidity** | 0.20 | 0.18 | 0.048 | 0.81 | 0.17 | 0.52 | 0.64 | 0.32 | 0.14 | 0.77 |
| **Parity** | 0.26 | 0.20 | -0.0045 | 0.99 | 0.45 | 0.20 | 1.04 | 0.23 | 0.33 | 0.62 |
| **Age at first live birth** | -0.035 | 0.64 | **0.25** | **0.033** | -0.049 | 0.70 | -0.058 | 0.87 | -0.13 | 0.59 |
| **Breastfeeding**  **Ever**  **Total months** | 0.91  0.042 | 0.11  0.078 | 0.51  0.040 | 0.51  0.22 | 1.36  0.077 | 0.17  0.068 | 3.8  0.20 | 0.12  0.054 | 1.02  0.10 | 0.59  0.20 |
| **Birth control** | 0.087 | 0.89 | -0.17 | 0.84 | -0.10 | 0.93 | 0.35 | 0.90 | 0.89 | 0.67 |
|  |  |  |  |  |  |  |  |  |  |  |
| ***Post-menopausal*** | β | p | β | p | β | p | β | p | β | p |
| **Ethnicity**  **Hispanic** | 0.59 | 0.65 | 0.31 | 0.86 | 1.78 | 0.33 | 1.36 | 0.77 | 1.97 | 0.58 |
| **Tobacco use**  **Ever**  **Years smoked** | **1.48**  0.040 | **0.025**  0.133 | 1.34  0.015 | 0.12  0.68 | 0.91  0.026 | 0.32  0.50 | **5.51**  0.025 | **0.015**  0.80 | 1.79  -0.025 | 0.31  0.73 |
| **Body mass index**  **Overweight**  **Obese** | **0.11**  -0.23  **1.53** | **0.012**  0.74  **0.014** | 0.073  -0.37  1.33 | 0.22  0.69  0.11 | 0.14  -0.62  1.49 | 0.027  0.53  0.093 | **0.33**  -1.67  **4.99** | **0.042**  0.51  **0.026** | 0.21  -0.93  2.98 | 0.087  0.63  0.083 |
| **Age at menarche** | -0.14 | 0.49 | -0.31 | 0.25 | 0.40 | 0.16 | -0.17 | 0.82 | -0.46 | 0.41 |
| **Age at menopause** | -0.048 | 0.28 | 0.021 | 0.71 | -0.022 | 0.71 | -0.13 | 0.41 | -0.042 | 0.73 |
| **Total menstrual years** | -0.052 | 0.22 | 0.024 | 0.68 | -0.062 | 0.30 | -0.17 | 0.25 | -0.054 | 0.64 |
| **Gravidity** | -0.10 | 0.61 | -0.42 | 0.11 | 0.084 | 0.77 | 0.61 | 0.41 | 0.33 | 0.55 |
| **Parity** | -0.056 | 0.82 | -0.53 | 0.093 | -0.089 | 0.79 | 0.36 | 0.68 | 0.31 | 0.64 |
| **Age at first live birth** | -0.070 | 0.44 | -0.047 | 0.66 | -0.22 | 0.099 | -0.36 | 0.28 | -0.13 | 0.59 |
| **Breastfeeding**  **Ever**  **Total months** | -0.58  -0.0086 | 0.38  0.70 | -1.64  -0.032 | 0.057  0.26 | -1.49  -0.0090 | 0.11  0.77 | -2.28  0.0083 | 0.34  0.92 | -0.75  -0.0021 | 0.68  0.97 |
| **Birth control** | -0.45 | 0.75 | -1.49 | 0.42 | -1.73 | 0.39 | 0.33 | 0.95 | -3.83 | 0.32 |
| **Hormone replacement** | 0.10 | 0.87 | -0.20 | 0.81 | -0.51 | 0.57 | 0.55 | 0.81 | -1.23 | 0.48 |

|  |
| --- |
|  |

*Each epigenetic age acceleration measure is adjusted for chronologic age.
